# Supplementary material
Source: MDPI journal article supplement (https://www.mdpi.com/1996-1073/16/1/143)
Supplement: s1 [file s1]

**Table S1.** Correlation between items of the assessment of the development of sustainable and intelligent transport system in Lodz.

|            | Y1     | Y2     | Y3     | Y4     | Y5     | Y6     | Y7     | Y8     | Y9     | Y10    | Y11    | Y12    | Y13    | Y14    | Y15    | Y16    | Y17    | Y18    | Y19 |
|------------|--------|--------|--------|--------|--------|--------|--------|--------|--------|--------|--------|--------|--------|--------|--------|--------|--------|--------|-----|
| <b>Y1</b>  | 1      |        |        |        |        |        |        |        |        |        |        |        |        |        |        |        |        |        |     |
| <b>Y2</b>  | 0.696* | 1      |        |        |        |        |        |        |        |        |        |        |        |        |        |        |        |        |     |
| <b>Y3</b>  | 0.427* | 0.348* | 1      |        |        |        |        |        |        |        |        |        |        |        |        |        |        |        |     |
| <b>Y4</b>  | 0.385* | 0.225* | 0.321* | 1      |        |        |        |        |        |        |        |        |        |        |        |        |        |        |     |
| <b>Y5</b>  | 0.235* | 0.214* | 0.238* | 0.252* | 1      |        |        |        |        |        |        |        |        |        |        |        |        |        |     |
| <b>Y6</b>  | 0.295* | 0.252* | 0.235* | 0.385* | 0.273* | 1      |        |        |        |        |        |        |        |        |        |        |        |        |     |
| <b>Y7</b>  | 0.375* | 0.340* | 0.367* | 0.303* | 0.166* | 0.369* | 1      |        |        |        |        |        |        |        |        |        |        |        |     |
| <b>Y8</b>  | 0.438* | 0.326* | 0.322* | 0.229* | -0.053 | 0.246* | 0.470* | 1      |        |        |        |        |        |        |        |        |        |        |     |
| <b>Y9</b>  | 0.299* | 0.323* | 0.273* | 0.295* | 0.257* | 0.365* | 0.394* | 0.338* | 1      |        |        |        |        |        |        |        |        |        |     |
| <b>Y10</b> | 0.324* | 0.244* | 0.381* | 0.218* | 0.022  | 0.086  | 0.299* | 0.449* | 0.109  | 1      |        |        |        |        |        |        |        |        |     |
| <b>Y11</b> | 0.189* | 0.151* | 0.222* | 0.130* | 0.247* | 0.202* | 0.245* | 0.178* | 0.230* | 0.184* | 1      |        |        |        |        |        |        |        |     |
| <b>Y12</b> | 0.245* | 0.213* | 0.260* | 0.256* | 0.281* | 0.222* | 0.281* | 0.160* | 0.368* | 0.166* | 0.645* | 1      |        |        |        |        |        |        |     |
| <b>Y13</b> | 0.235* | 0.187* | 0.148* | 0.208* | 0.047  | 0.228* | 0.168* | 0.274* | -0.049 | 0.324* | 0.168* | 0.141* | 1      |        |        |        |        |        |     |
| <b>Y14</b> | 0.164* | 0.184* | 0.124  | 0.250* | 0.121  | 0.261* | 0.259* | 0.272* | 0.116  | 0.273* | 0.264* | 0.259* | 0.359* | 1      |        |        |        |        |     |
| <b>Y15</b> | 0.139* | 0.159* | 0.149* | 0.132* | 0.066  | 0.014  | 0.135* | 0.143* | 0.071  | 0.272* | 0.203* | 0.160* | 0.198* | 0.209* | 1      |        |        |        |     |
| <b>Y16</b> | 0.181* | 0.191* | 0.317* | 0.294* | 0.072  | 0.111  | 0.277* | 0.226* | 0.206* | 0.116  | 0.198* | 0.284* | 0.175* | 0.084  | 0.056  | 1      |        |        |     |
| <b>Y17</b> | 0.143* | 0.179* | 0.159* | 0.127* | -0.031 | 0.067  | 0.259* | 0.195* | 0.146* | 0.002  | 0.125  | 0.156* | 0.094  | 0.086  | 0.033  | 0.575* | 1      |        |     |
| <b>Y18</b> | 0.217* | 0.254* | 0.255* | 0.159* | 0.162* | 0.107  | 0.246* | 0.172* | 0.153* | 0.051  | 0.192* | 0.268* | 0.041  | 0.063  | -0.028 | 0.512* | 0.437* | 1      |     |
| <b>Y19</b> | 0.105  | 0.123  | 0.205* | 0.107* | 0.078  | 0.118  | 0.241* | 0.179* | 0.184* | 0.028  | 0.252* | 0.235* | 0.077  | 0.136* | 0.148* | 0.207* | 0.058  | 0.167* | 1   |

rho Spearman coefficient was used. \*  $p < 0.05$ 

Source: own elaboration

Respondents who score intelligent transportation systems higher also give higher scores to the development of modern transport services in Lodz ( $\rho = 0.696$ ). The high correlation is observed also for the assessment of the ring roads and motorways and expressways around the city ( $\rho = 0.645$ ). The strong correlation is observed also between different aspects regarding electronic solutions in transport services – especially timetables are related with digital passenger information display boards at stops ( $\rho = 0.575$ ) and bus/tramway route maps ( $\rho = 0.512$ ). In case of these pairs of variables, size effect is high. For most pairs of Y1-Y19 the variable is moderate or small.
